# Supplementary material for: Effect of Juglone and Other Allelochemicals in Walnut Leaves on Yield, Quality and Metabolites of Snack Cucumber (Cucumis sativus L.)
Source: MDPI journal article supplement (doi:10.3390/foods12020371), 2023-01-12
Supplement: s1 [file s1]

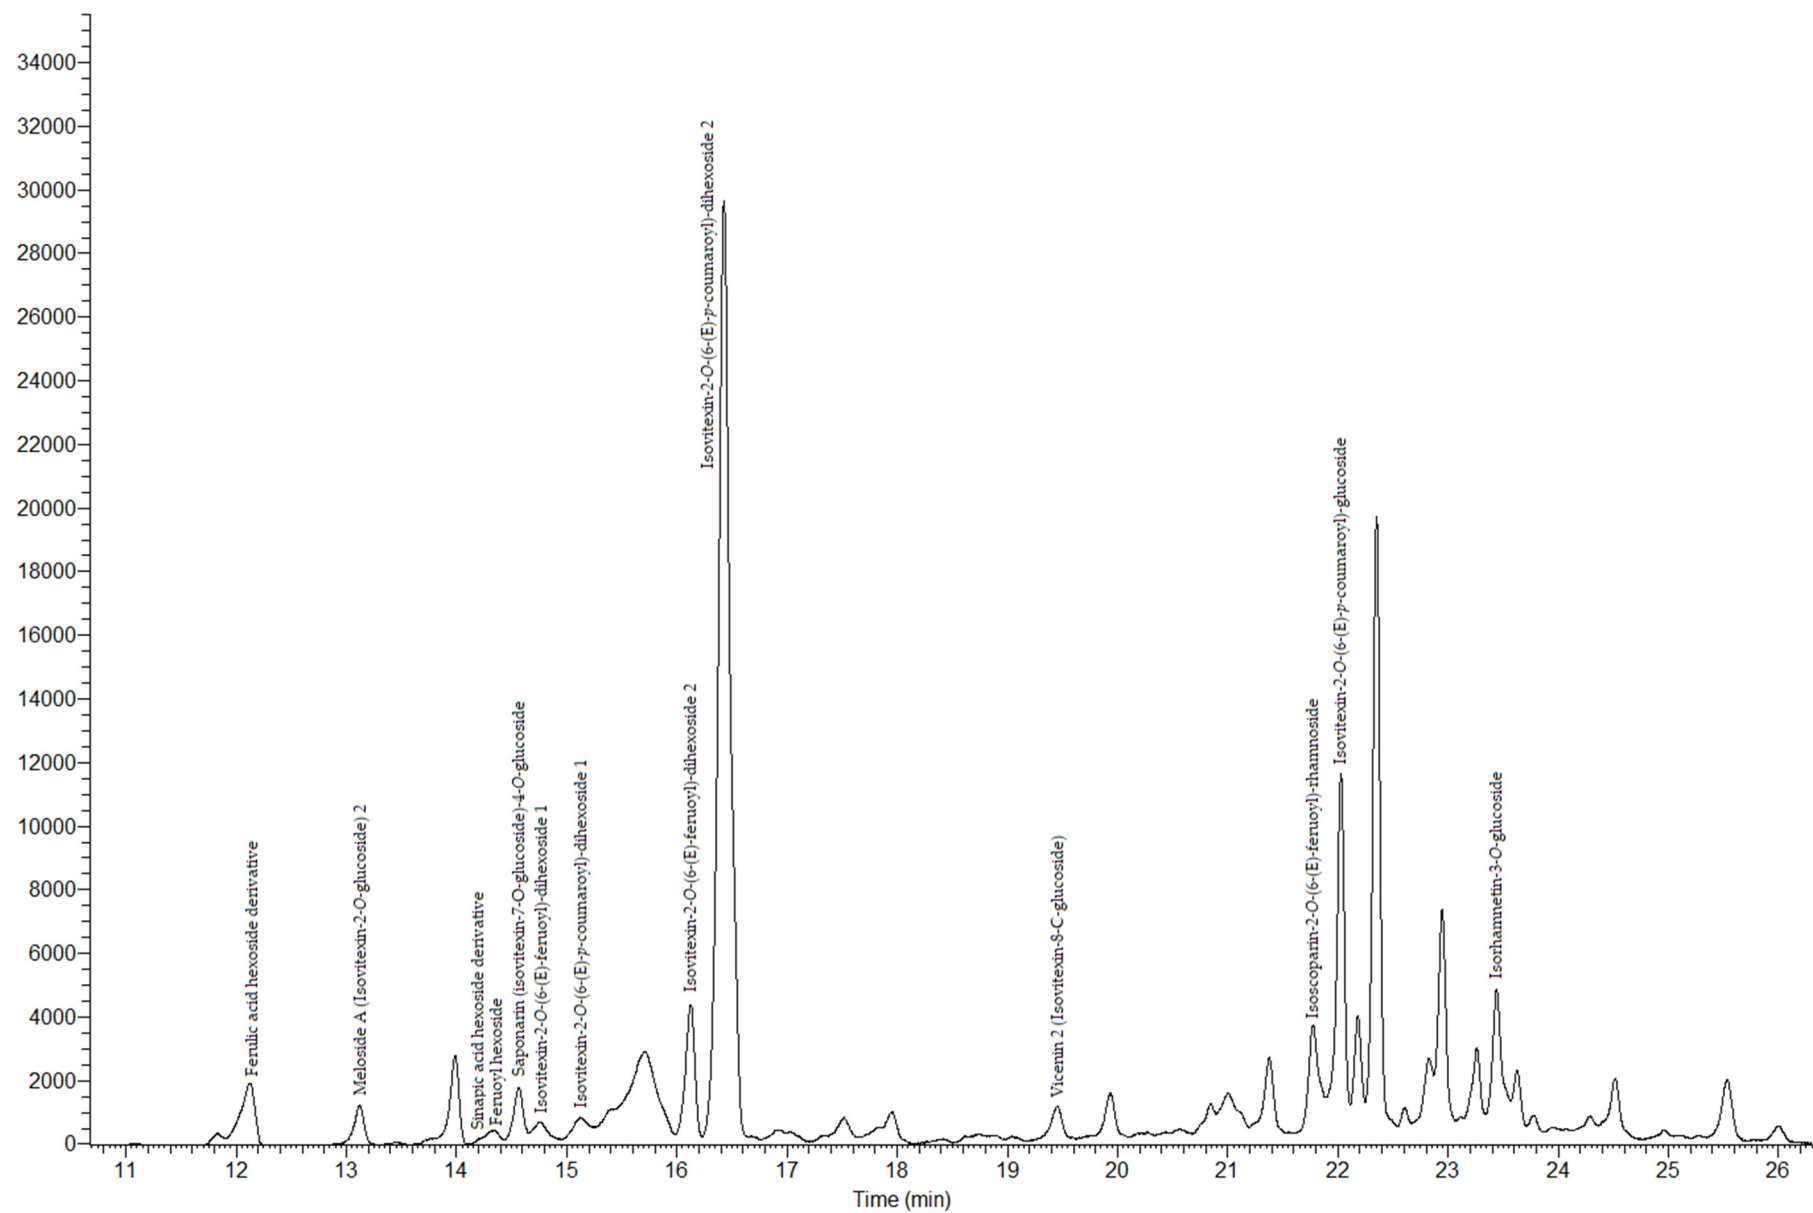

**Figure S1.** Chromatogram of the compounds identified in the fruit of *C. sativus* at 280 nm.

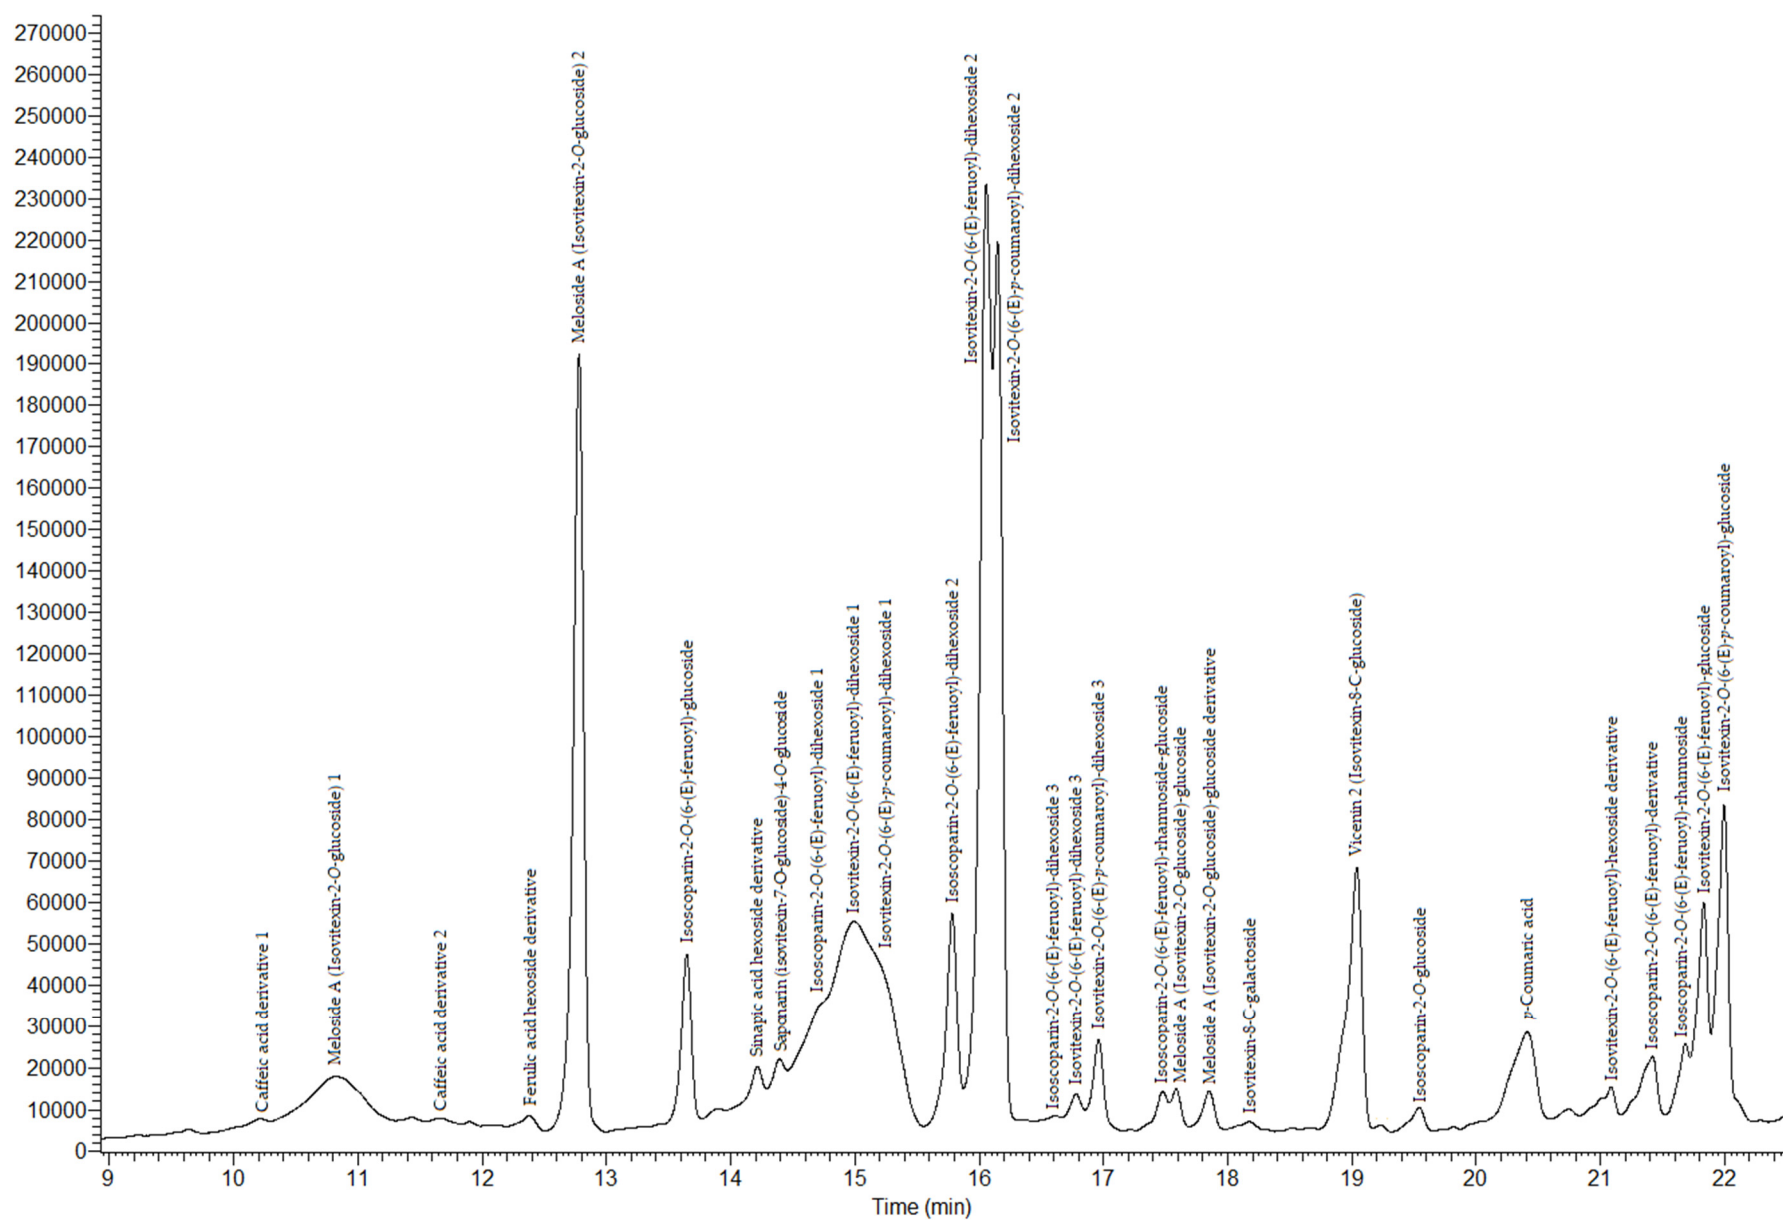

**Figure S2.** Chromatogram of the compounds identified in the leaves of *C. sativus* at 280 nm.

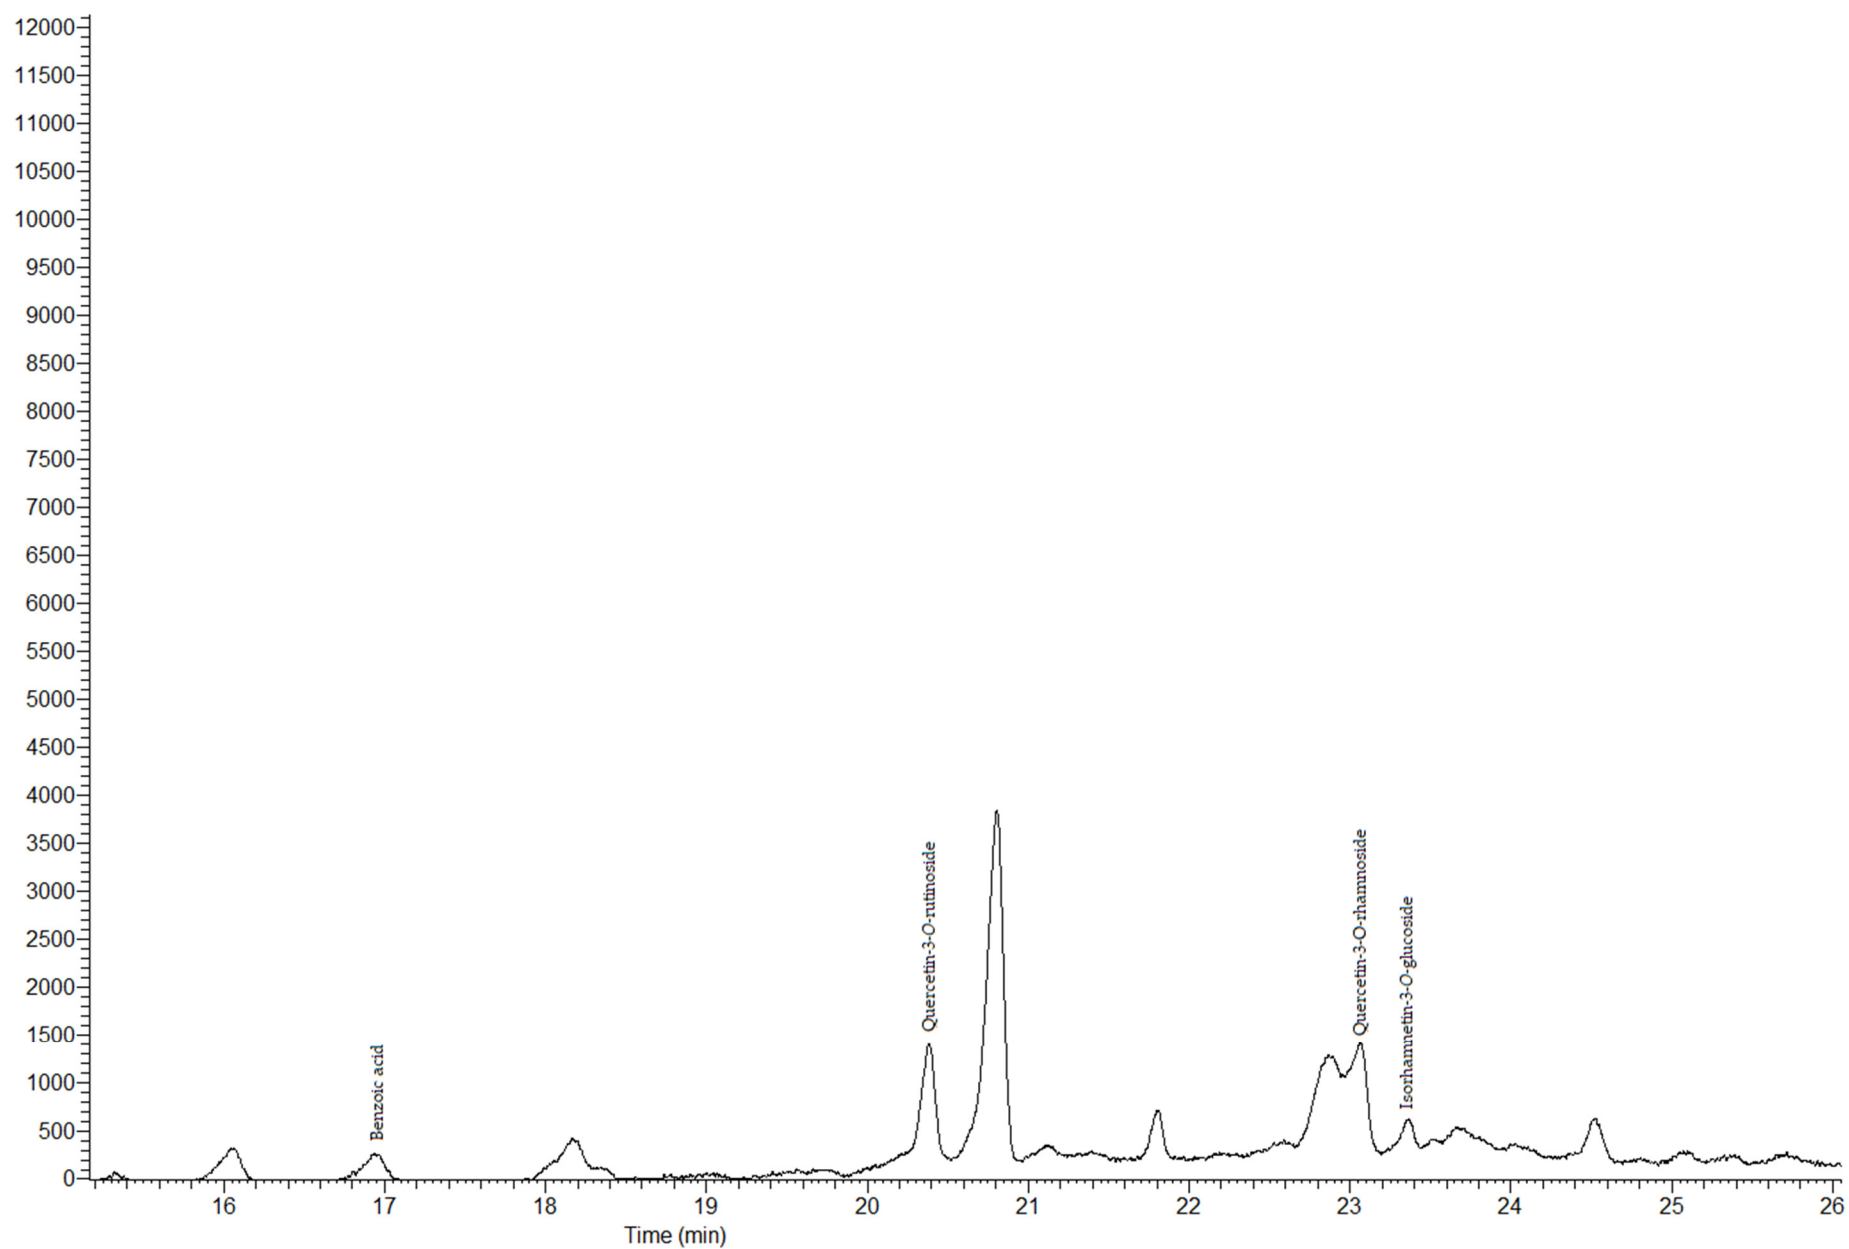

**Figure S3.** Chromatogram of the compounds identified in the roots of *C. sativus* at 280 nm.
